# Supplementary material for: Genomic characteristics of pancreatic squamous cell carcinoma, an investigation by using high throughput sequencing after in-solution hybrid capture
Source: PubMed Central journal article supplement (PMC5362430; doi:10.18632/oncotarget.14678), 2017-01-16
Supplement: oncotarget-08-14620-s001.pdf [file oncotarget-08-14620-s001.pdf]

## Genomic characteristics of pancreatic squamous cell carcinoma, an investigation by using high throughput sequencing after in-solution hybrid capture

### Supplementary Materials

**Supplementary Table 1: List of 137 cancer-related gene panel**

| ABL1    | ABL2    | AKT1   | AKT2   | AKT3     | ALK     | APC     | ATM    |
|---------|---------|--------|--------|----------|---------|---------|--------|
| AURKA   | BCL2    | BRAF   | BRCA1  | BRCA2    | CCND1   | CCNE1   | CDC73  |
| CDH1    | CDK4    | CDK6   | CDK8   | CDKN1A   | CDKN2A  | CEBPA   | CHEK1  |
| CHEK2   | CREBBP  | CRKL   | CSF1R  | CTNNB1   | EGFR    | EPHA3   | EPHA5  |
| EPHB6   | ERBB2   | ERBB3  | ERBB4  | FBXW7    | FGFR1   | FGFR2   | FGFR3  |
| FGFR4   | FHIT    | FKBP9  | FLT1   | FLT3     | FLT4    | MTOR    | GNAQ   |
| GNAS    | GUCY1A2 | HNF1A  | HRAS   | HSP90AA1 | IDH1    | IDH2    | IGF1R  |
| IKBKE   | IKZF1   | JAK2   | JAK3   | KDR      | KEAP1   | MTUS2   | RPTOR  |
| KIT     | KRAS    | MAP2K1 | MAP2K2 | MAP2K4   | MCL1    | MDM2    | MDM4   |
| MEN1    | MET     | MITF   | MLH1   | MLL      | MPL     | MRE11A  | MSH2   |
| MSH6    | MYC     | MYCL1  | MYCN   | NF1      | NF2     | NKX2-1  | NOTCH1 |
| NOTCH2  | NOTCH3  | NOTCH4 | NPM1   | NRAS     | NTRK1   | NTRK2   | NTRK3  |
| PAX5    | PDGFRA  | PDGFRB | PDPK1  | PIK3CA   | PIK3R1  | PTCH1   | PTEN   |
| PTK2B   | PTPN11  | PTPRD  | RAF1   | RB1      | REL     | RET     | RICTOR |
| RUNX1   | RUNX1T1 | SMAD2  | SMAD3  | SMAD4    | SMARCA4 | SMARCB1 | SMO    |
| SOCS1   | SRC     | STK11  | SUFU   | TCF4     | TERT    | TET2    | TGFBR2 |
| TNFAIP3 | TOP1    | TP53   | TSC1   | TSC2     | TSHR    | VHL     | WT1    |
| ZNF668  |         |        |        |          |         |         |        |

**Supplementary Table 2: Genomic characteristics of pancreatic squamous cell carcinoma, an investigation by using high throughput sequencing after in-solution hybrid capture.** See Supplementary\_Table\_2
